# Supplementary material
Source: Royal Society of Chemistry journal article supplement (doi:10.1039/d6cp01541g)
Supplement: d6cp01541g1.pdf [file d6cp01541g1.pdf]

## Supplementary Material

# Stabilizing Antiaromatic C<sub>13</sub> through Metal Encapsulation: A Dual Stabilization Mechanism Achieving Closed-Shell Noble- Gas-Like Metal Centers and Double Aromaticity

Yan-Zi Yu<sup>a</sup>, Lu Zhao<sup>a</sup>, Jing Chen<sup>a\*</sup> and Shi-Bo Cheng<sup>a\*</sup>

*<sup>a</sup>School of Chemistry and Chemical Engineering, Shandong University, Jinan 250100,  
P.R. China*

\*Corresponding Authors:

jingchen@sdu.edu.cn and shibocheng@sdu.edu.cn

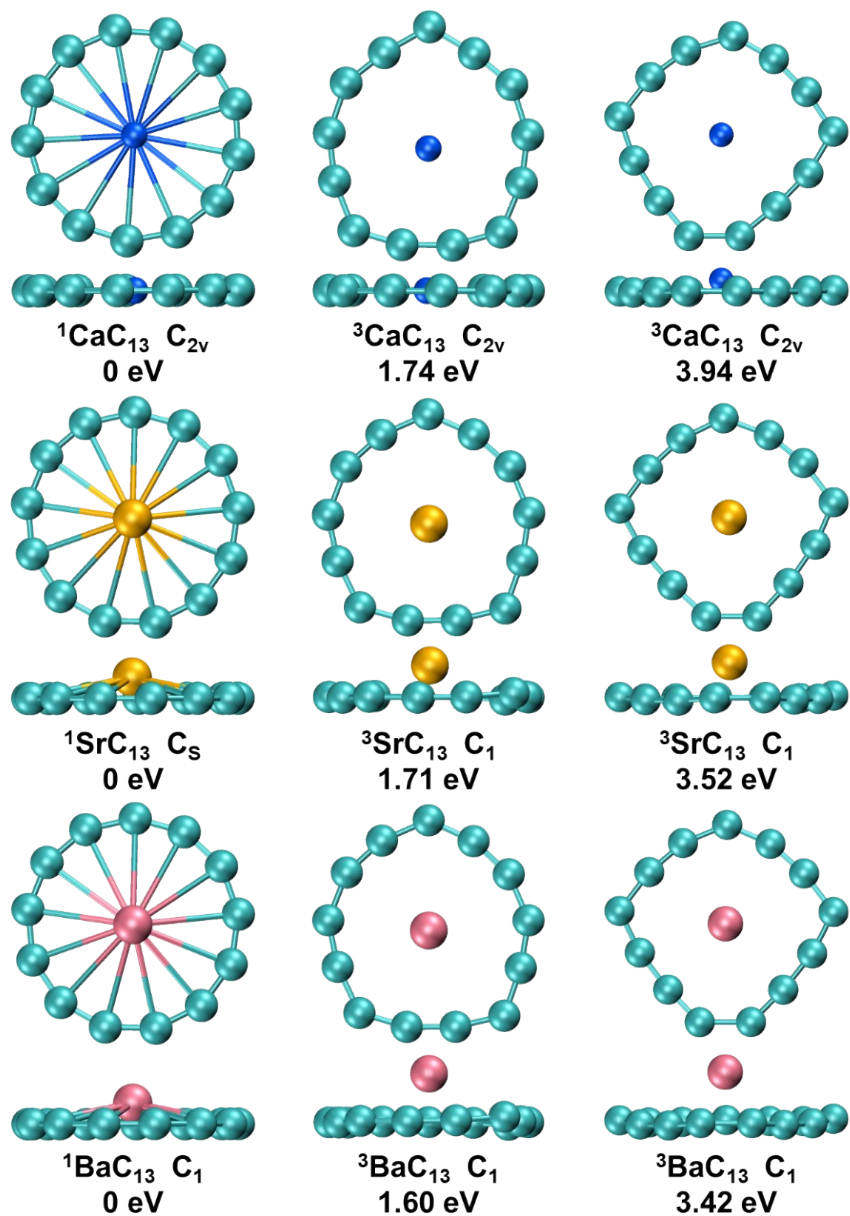

**Fig. S1.** Top and side views of geometric configurations for endohedral  $\text{MC}_{13}$  (where M represents Ca, Sr, or Ba) featuring different spin multiplicities calculated at the  $\omega\text{B97X-D/def2-TZVP}$  level, respectively. The energy value denotes the energy difference between triplet/quintet-state and singlet-state structures.

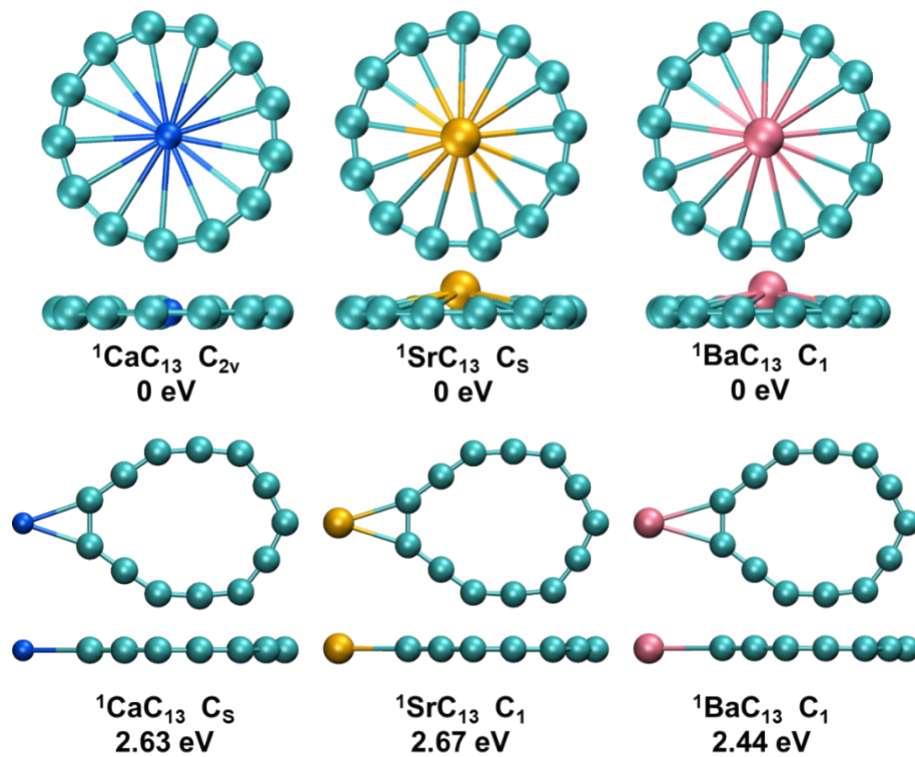

**Fig. S2.** Singlet-state geometric configurations of endohedral  $\text{MC}_{13}$  and exohedral  $\text{MC}_{13}$  ( $M = \text{Ca}, \text{Sr}, \text{and Ba}$ ) calculated at the  $\omega\text{B97X-D/def2-TZVP}$  level, respectively. The energy value corresponds to the energy difference between exohedral isomers (metal atom outside the ring) and the most stable endohedral structures (metal atom inside the ring).

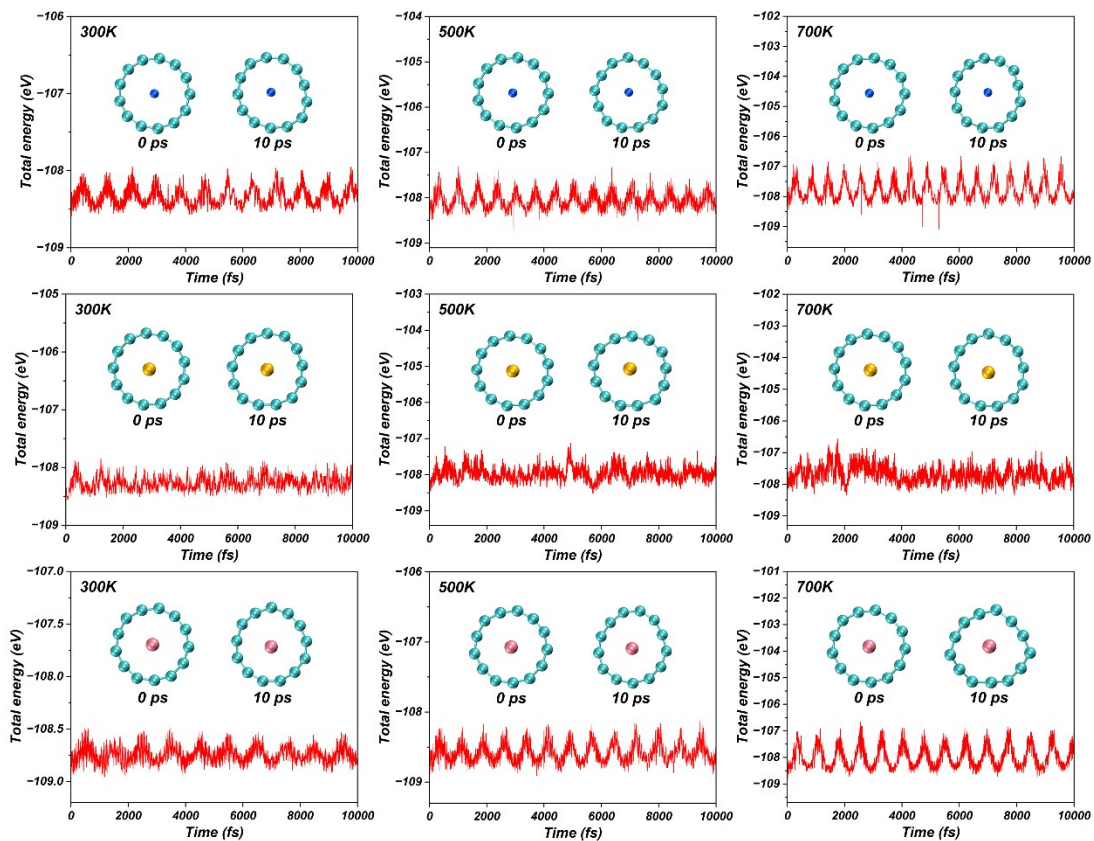

**Fig. S3.** AIMD simulations of (a) CaC<sub>13</sub>, (b) SrC<sub>13</sub>, and (c) BaC<sub>13</sub> at 300 K, 500 K, and 700 K over 10 ps, respectively.

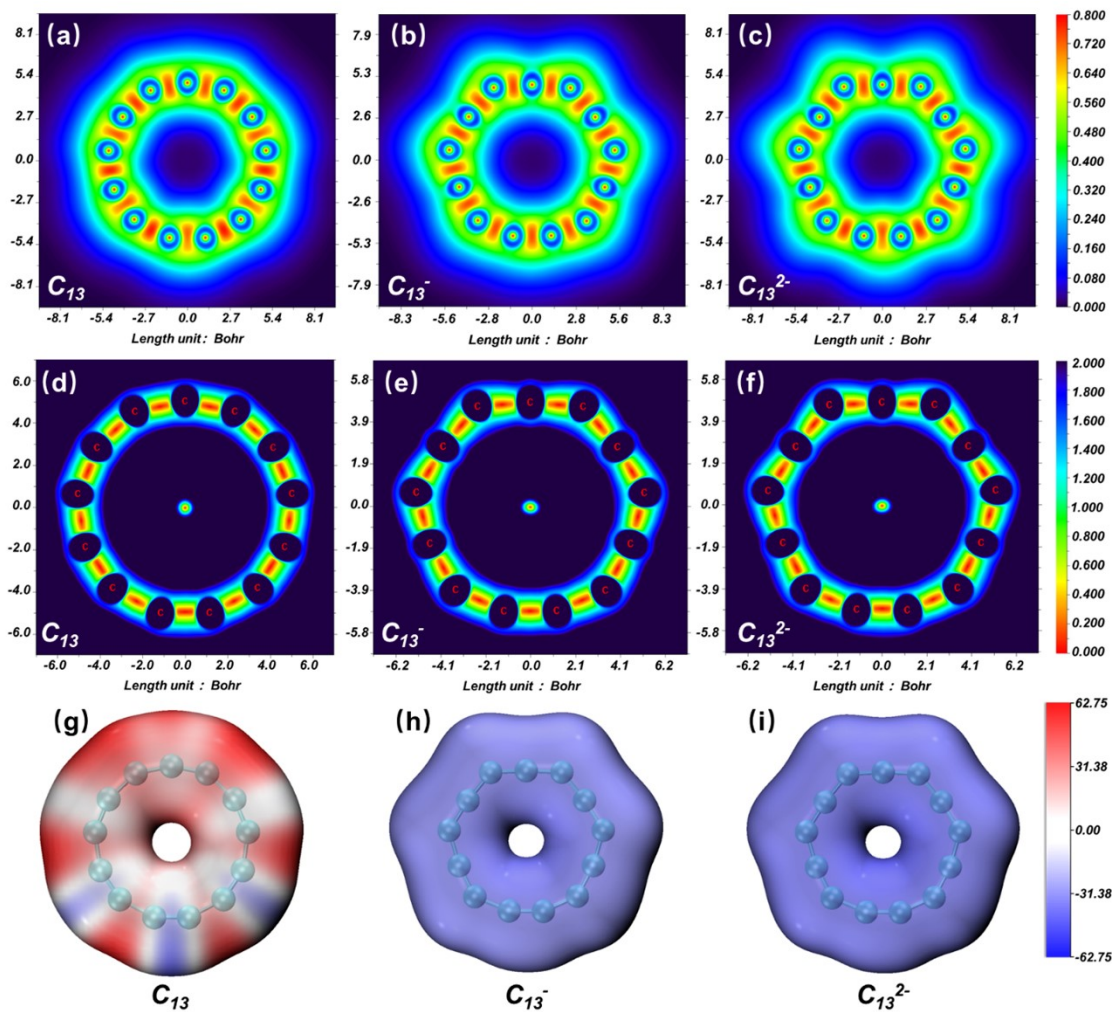

**Fig. S4.** Color-filled two-dimensional maps of the (a-c) localized orbital locator (LOL), (d-f) interaction region indicator (IRI), and (g-i) electrostatic potential (ESP) of  $C_{13}$ ,  $C_{13}^-$ , and  $C_{13}^{2-}$ .



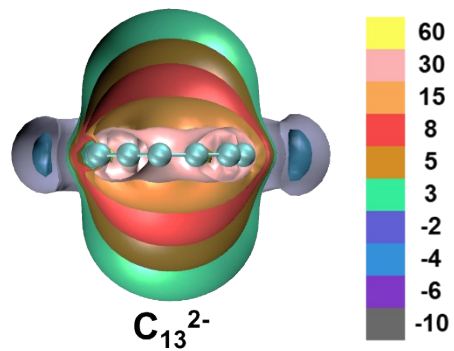

**Fig. S6.** Multiple clipped isosurfaces of  $ICSS_{zz}$  of the  $C_{13}^{2-}$  dianion.

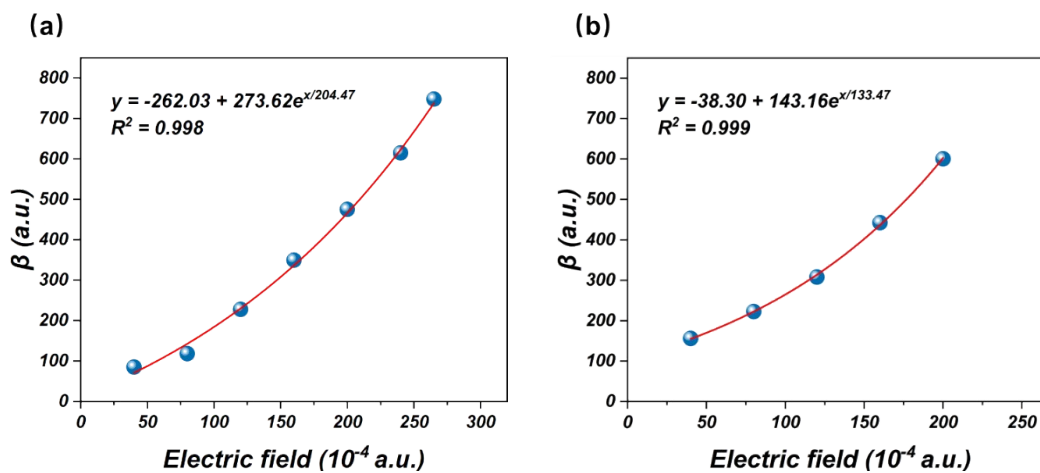

**Fig. S7.** Variation curve of  $\beta_0$  for (a)  $SrC_{13}$  and (b)  $BaC_{13}$  with OEEF.

**Table S1.** Energies (in eV) of triplet-state endohedral  $MC_{13}$ , singlet-state endohedral  $MC_{13}$ , and singlet-state exohedral  $MC_{13}$  ( $M = Ca, Sr, Ba$ ) calculated at the  $\omega B97X-D/def2-TZVP$  level with SDD basis sets added for Ca, Sr, and Ba atoms, respectively. The endohedral singlet configuration is the most stable, and  $\Delta E$  (in eV) denotes the energy difference relative to this minimum-energy structure for triplet endohedral and singlet exohedral configurations.

| System     | M-site  | Multiplicities | Electronic Energy (eV) | $\Delta E$ (eV) |
|------------|---------|----------------|------------------------|-----------------|
| $CaC_{13}$ | Inside  | Singlet        | -14469.20              | 0.00            |
|            |         | Triplet        | -14467.46              | 1.74            |
|            |         | Quintet        | -14465.71              | 3.49            |
|            | Outside | Singlet        | -14466.56              | 2.63            |
| $SrC_{13}$ | Inside  | Singlet        | -14303.27              | 0.00            |
|            |         | Triplet        | -14301.57              | 1.71            |
|            |         | Quintet        | -14299.76              | 3.52            |
|            | Outside | Singlet        | -14300.61              | 2.67            |
| $BaC_{13}$ | Inside  | Singlet        | -14161.30              | 0.00            |
|            |         | Triplet        | -14159.70              | 1.60            |
|            |         | Quintet        | -14157.88              | 3.42            |
|            | Outside | Singlet        | -14158.86              | 2.44            |

**Table S2.** Cartesian coordinates of optimized C<sub>13</sub> and MC<sub>13</sub> (M = Ca, Sr, and Ba).C<sub>13</sub> (Charge = 0; Spin multiplicity = 3)

|   |             |             |            |
|---|-------------|-------------|------------|
| C | 2.20417200  | 1.50314400  | 0.00000000 |
| C | 2.67705100  | 0.35566300  | 0.00000000 |
| C | 2.49516200  | -0.97656000 | 0.00000000 |
| C | 1.81699600  | -1.99573400 | 0.00000000 |
| C | 0.61145100  | -2.61954400 | 0.00000000 |
| C | -0.60819800 | -2.62207500 | 0.00000000 |
| C | -1.81086000 | -1.99679700 | 0.00000000 |
| C | -2.49235000 | -0.97593700 | 0.00000000 |
| C | -2.68039200 | 0.34936700  | 0.00000000 |
| C | -2.20235200 | 1.50274600  | 0.00000000 |
| C | -1.25590500 | 2.40561000  | 0.00000000 |
| C | 0.00000000  | 2.66282600  | 0.00000000 |
| C | 1.24522600  | 2.40729000  | 0.00000000 |

CaC<sub>13</sub> (Charge = 0; Spin multiplicity = 1)

|    |             |             |            |
|----|-------------|-------------|------------|
| C  | -1.65000000 | 2.12500000  | 0.00000000 |
| C  | -0.47400000 | 2.64400000  | 0.00000000 |
| C  | -0.17700000 | -2.67800000 | 0.00000000 |
| C  | 0.80900000  | 2.56300000  | 0.00000000 |
| C  | 1.90600000  | 1.89200000  | 0.00000000 |
| C  | 2.63900000  | -0.49500000 | 0.00000000 |
| C  | 2.56700000  | 0.78900000  | 0.00000000 |
| C  | 2.10600000  | -1.66500000 | 0.00000000 |
| C  | 1.08900000  | -2.45300000 | 0.00000000 |
| C  | -1.40400000 | -2.29100000 | 0.00000000 |
| C  | -2.44600000 | 1.11500000  | 0.00000000 |
| C  | -2.30700000 | -1.37700000 | 0.00000000 |
| C  | -2.68600000 | -0.14800000 | 0.00000000 |
| Ca | 0.00900000  | -0.00700000 | 0.00000000 |

SrC<sub>13</sub> (Charge = 0; Spin multiplicity = 1)

|   |             |             |             |
|---|-------------|-------------|-------------|
| C | -2.54000000 | -0.89900000 | -0.17900000 |
| C | -2.66700000 | 0.38300000  | -0.17900000 |
| C | 2.49800000  | -1.01000000 | -0.17900000 |
| C | -2.18300000 | 1.57900000  | -0.17900000 |
| C | -1.19900000 | 2.41200000  | -0.17900000 |
| C | 1.30400000  | 2.35600000  | -0.17900000 |
| C | 0.05900000  | 2.69400000  | -0.17800000 |

|    |             |             |             |
|----|-------------|-------------|-------------|
| C  | 2.25100000  | 1.48200000  | -0.17800000 |
| C  | 2.68100000  | 0.26600000  | -0.17900000 |
| C  | 1.74200000  | -2.05400000 | -0.18000000 |
| C  | -1.83100000 | -1.97700000 | -0.17800000 |
| C  | 0.58800000  | -2.63000000 | -0.17900000 |
| C  | -0.70200000 | -2.60000000 | -0.17900000 |
| Sr | 0.00000000  | 0.00000000  | 0.36700000  |

BaC<sub>13</sub> (Charge = 0; Spin multiplicity = 1)

|    |             |             |             |
|----|-------------|-------------|-------------|
| C  | 1.15300000  | 2.47200000  | -0.46600000 |
| C  | 2.10000000  | 1.61500000  | -0.49400000 |
| C  | -2.47600000 | -1.10100000 | -0.47500000 |
| C  | 2.70000000  | 0.46500000  | -0.46000000 |
| C  | 2.51700000  | -0.80900000 | -0.49500000 |
| C  | 0.76500000  | -2.53400000 | -0.49300000 |
| C  | 1.92400000  | -1.95200000 | -0.46000000 |
| C  | -0.50500000 | -2.68200000 | -0.46500000 |
| C  | -1.66200000 | -2.07800000 | -0.49100000 |
| C  | -2.67600000 | 0.19400000  | -0.48600000 |
| C  | -0.14000000 | 2.65900000  | -0.49000000 |
| C  | -2.28900000 | 1.40200000  | -0.48400000 |
| C  | -1.36900000 | 2.33600000  | -0.47500000 |
| Ba | -0.00400000 | 0.00100000  | 0.66800000  |

**Table S3.** The results of sobEDA<sub>w</sub> calculation for MC<sub>13</sub> (M = Ca, Sr, Ba), divided into neutral fragments: M and the C<sub>13</sub> (triplet), charged fragments: the metal cation M<sup>+</sup> and the C<sub>13</sub><sup>-</sup> (singlet) and charged fragments: the metal cation M<sup>2+</sup> and the C<sub>13</sub><sup>2-</sup> (singlet).

| Term                       | Energy (kcal/mol)                              |                                                                          |                                                                            |
|----------------------------|------------------------------------------------|--------------------------------------------------------------------------|----------------------------------------------------------------------------|
|                            | <sup>1</sup> Ca + <sup>3</sup> C <sub>13</sub> | <sup>1</sup> Ca <sup>+</sup> + <sup>1</sup> C <sub>13</sub> <sup>-</sup> | <sup>1</sup> Ca <sup>2+</sup> + <sup>1</sup> C <sub>13</sub> <sup>2-</sup> |
| $\Delta E_{\text{int}}$    | -46.62                                         | -92.85                                                                   | -485.02                                                                    |
| $\Delta E_{\text{els}}^a$  | -215.84 (49.45%)                               | -205.41 (62.43%)                                                         | -408.45 (75.37%)                                                           |
| $\Delta E_{\text{orb}}^a$  | -184.01 (42.15%)                               | -90.83 (27.60%)                                                          | -113.62 (20.97%)                                                           |
| $\Delta E_{\text{disp}}^a$ | -36.65 (8.40%)                                 | -32.81(9.97%)                                                            | -19.83 (3.66%)                                                             |
| $\Delta E_{\text{xrep}}$   | 389.88                                         | 236.2                                                                    | 56.88                                                                      |
| Term                       | Energy (kcal/mol)                              |                                                                          |                                                                            |
|                            | <sup>1</sup> Sr + <sup>3</sup> C <sub>13</sub> | <sup>1</sup> Sr <sup>+</sup> + <sup>1</sup> C <sub>13</sub> <sup>-</sup> | <sup>1</sup> Sr <sup>2+</sup> + <sup>1</sup> C <sub>13</sub> <sup>2-</sup> |
| $\Delta E_{\text{int}}$    | -42.88                                         | -92.85                                                                   | -449.62                                                                    |
| $\Delta E_{\text{els}}^a$  | -226.12 (49.46)                                | -205.41 (62.43%)                                                         | -406.17 (76.42%)                                                           |
| $\Delta E_{\text{orb}}^a$  | -192.36 (42.08%)                               | -90.83 (27.60%)                                                          | -102.53 (19.29%)                                                           |
| $\Delta E_{\text{disp}}^a$ | -38.69 (8.46%)                                 | -32.81 (9.97%)                                                           | -22.78 (4.29%)                                                             |
| $\Delta E_{\text{xrep}}$   | 414.29                                         | 236.2                                                                    | 81.84                                                                      |
| Term                       | Energy (kcal/mol)                              |                                                                          |                                                                            |
|                            | <sup>1</sup> Ba + <sup>3</sup> C <sub>13</sub> | <sup>1</sup> Ba <sup>+</sup> + <sup>1</sup> C <sub>13</sub> <sup>-</sup> | <sup>1</sup> Ba <sup>2+</sup> + <sup>1</sup> C <sub>13</sub> <sup>2-</sup> |
| $\Delta E_{\text{int}}$    | -60.00                                         | -96.57                                                                   | -424.54                                                                    |
| $\Delta E_{\text{els}}^a$  | -204.19 (46.33%)                               | -192.26 (59.53%)                                                         | -385.95 (75.23%)                                                           |
| $\Delta E_{\text{orb}}^a$  | -198.14 (44.96%)                               | -97.62 (30.23%)                                                          | -102.84 (20.05%)                                                           |
| $\Delta E_{\text{disp}}^a$ | -38.36 (8.70%)                                 | -33.09 (10.25%)                                                          | -24.22 (4.72%)                                                             |
| $\Delta E_{\text{xrep}}$   | 380.69                                         | 226.4                                                                    | 88.47                                                                      |
